# Supplementary material for: Further Studies on the 3-Ketosteroid 9α-Hydroxylase of Rhodococcus ruber Chol-4, a Rieske Oxygenase of the Steroid Degradation Pathway
Source: Microorganisms. 2021 May 29;9(6):1171. doi: 10.3390/microorganisms9061171 (PMC8228715; doi:10.3390/microorganisms9061171)
Supplement: Supplementary file 1 [file microorganisms-09-01171-s001.zip › microorganisms-1219156-supplementary.pdf]

|                                                     |                 |                             |
|-----------------------------------------------------|-----------------|-----------------------------|
| AAGGAGG                                             | AAAAAACATATG    | RBS (actinobacteria)        |
| AAGGAGG                                             |                 | RBS ( <i>Streptomyces</i> ) |
| AAGGACC                                             | GACCTGGCCATG    | <i>kshB</i>                 |
| AAGGACG                                             | GACGACAGTG      | <i>kshA1</i>                |
| GAGGACA                                             | ATG             | <i>kshA2</i>                |
| AAGGAAA                                             | GTGAGGGGACG ATG | <i>kshA3</i>                |
| <br>                                                |                 |                             |
| TAGGA GA                                            | GAATTCAATG      | <i>cyp450</i>               |
| AAGGCTT                                             | CGAGC ATG       | <i>kstD1</i>                |
| AAGGAGC                                             | AGATCG ATG      | <i>kstD2</i>                |
| <br>                                                |                 |                             |
| A <sub>71</sub> AGGAC <sub>42</sub> A <sub>42</sub> |                 |                             |

**Figure S1.** RBS comparison of some steroid *Rhodococcus ruber* genes. The Figure 41. or actinobacteria [42]. The rest lines are ORFs from *R. ruber* related with the steroid catabolism. The nucleotides before the initial codon are also indicated. The proposed consensus takes into account only the *R. ruber* putative RBS.

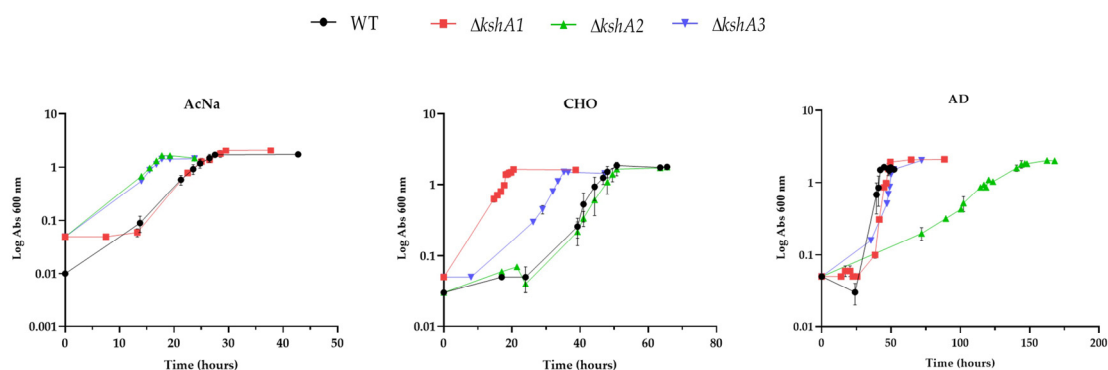

**Figure S2.** Growth curves of WT and *ksh* single mutants *Rhodococcus ruber* strains in minimal medium with different steroids as carbon source. A representative experiment of 3–6 replicates is shown.

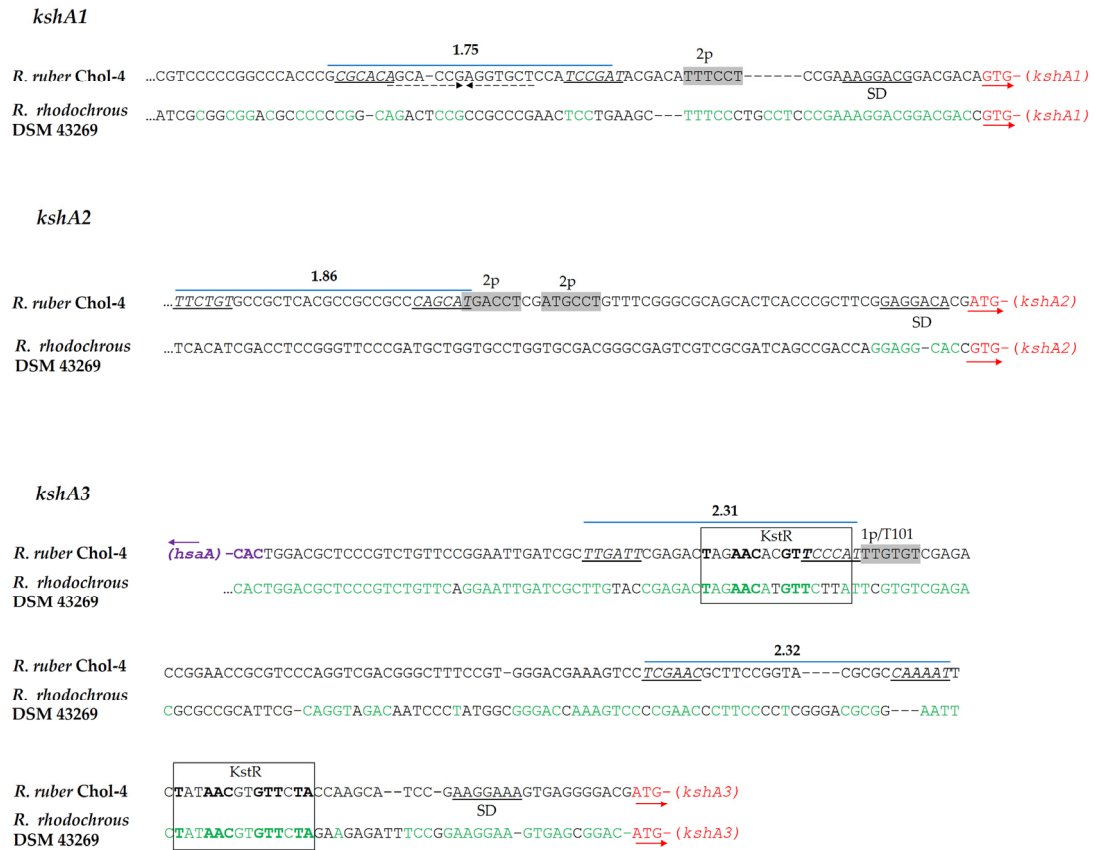

**Figure S3.** Comparison of upstream regions of *ksh* ORFs. Data accession: *R. ruber* (NCIB::ANGC00000000.2), HQ425873 (*kshA1*), HQ425874 (*kshA2*), HQ425875 (*kshA3*), HQ425876 (*kshA4*), and HQ425877 (*kshA5*).
